# Supplementary material
Source: PubMed Central journal article supplement (PMC6954689)

Supplementary Figure 1. OCT device case (A) and hand held rigid probe (B) with tip

A

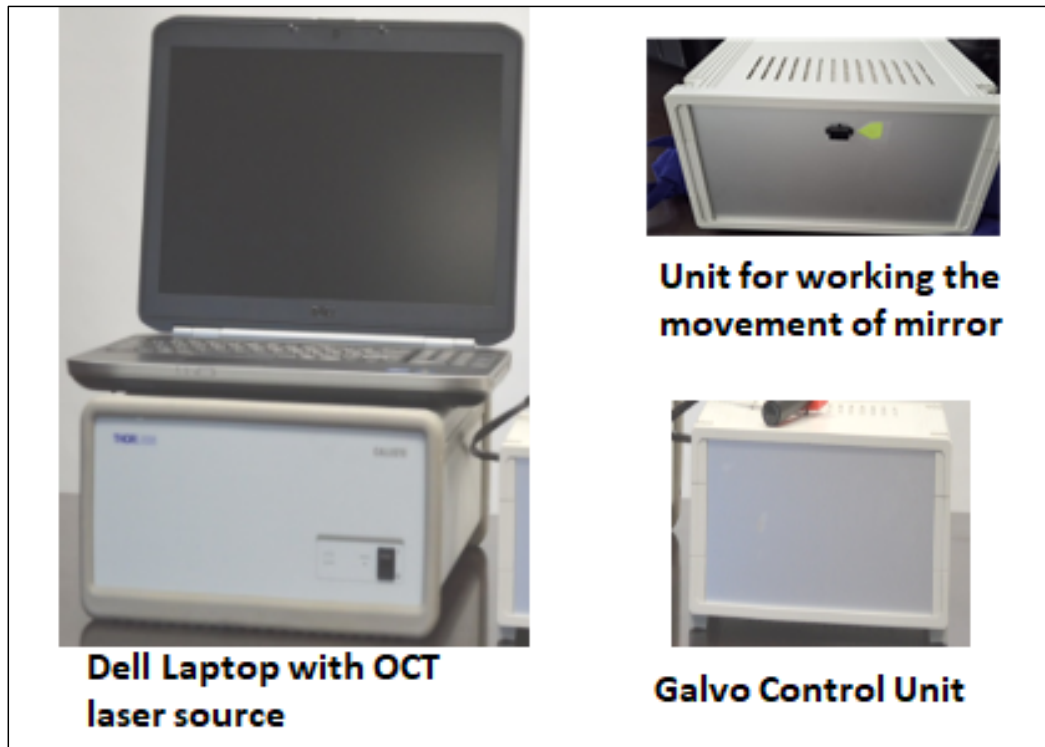

B

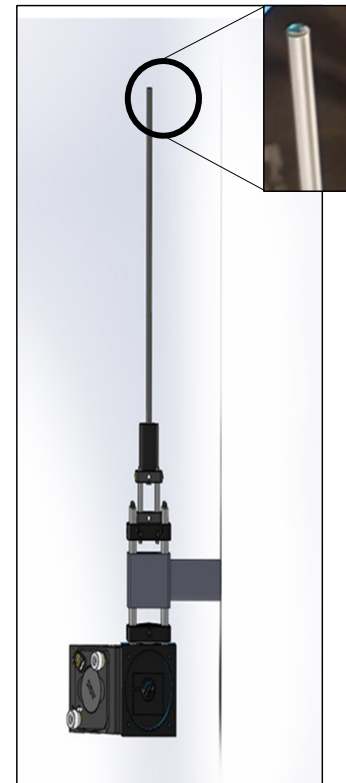

Supplementary Figure 2. Trend of Field cancerization: The detail histology diagnosis of each site of all patients (A). Each block (brown dotted lines) represents each patient (P=patient; n=14). Graph shows (B) shows the trend of decreasing the severity of histology (HGD and mild dysplasia) as it is going from zone 2 to 5.

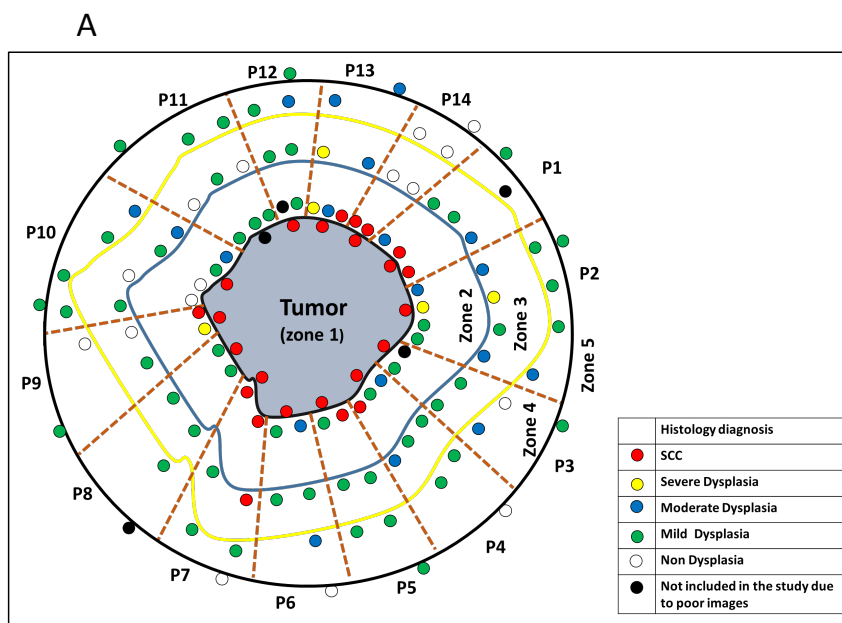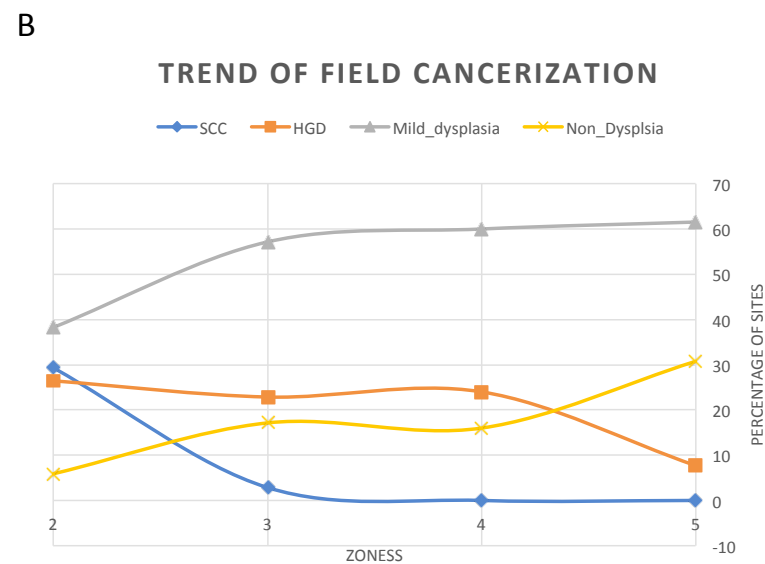

Supplement: NIHMS1059401-supplement-S.pdf [file NIHMS1059401-supplement-S.pdf]
